# Supplementary material for: Theoretical study of the surface modification of indium tin oxide with trifluorophenyl phosphonic acid molecules: impact of coverage density and binding geometry
Source: Royal Society of Chemistry journal article supplement (doi:10.1039/b921768a), 2010-01-01
Supplement: b921768a.pdf [file b921768a.pdf]

**Theoretical Study of the Surface Modification of Indium Tin  
Oxide with Trifluorophenyl Phosphonic Acid Molecules:  
Impact of Coverage Density and Binding Geometry**

**Hong Li, Pavel Paramonov, and Jean-Luc Bredas**

School of Chemistry and Biochemistry & Center

for Organic Photonics and Electronics

Georgia Institute of Technology

Atlanta, Georgia 30332-0400

**SUPPLEMENTARY INFORMATION:**

**Adsorption Geometries of Phosphonic Acid Molecules on ITO**

**at Coverage Density  $n=2$**

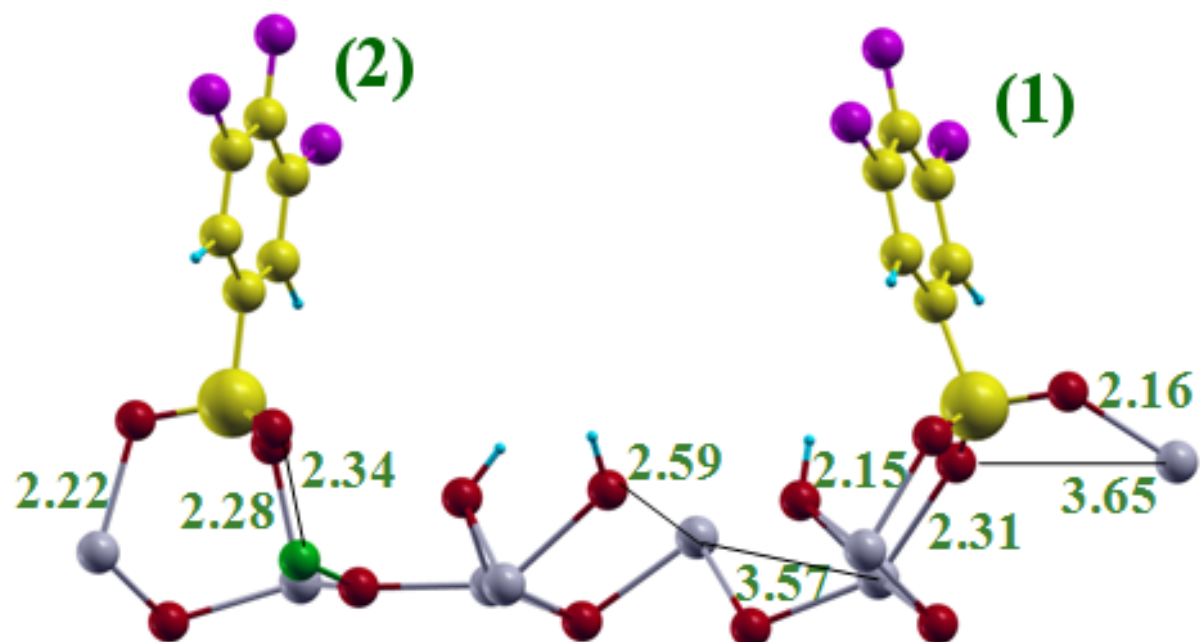

Figure S1. Side view of the fully optimized adsorption geometry of two PA molecules at site-1 and site-2. Only part of the ITO surface is shown. The values in green represent optimized bond lengths (in Å).

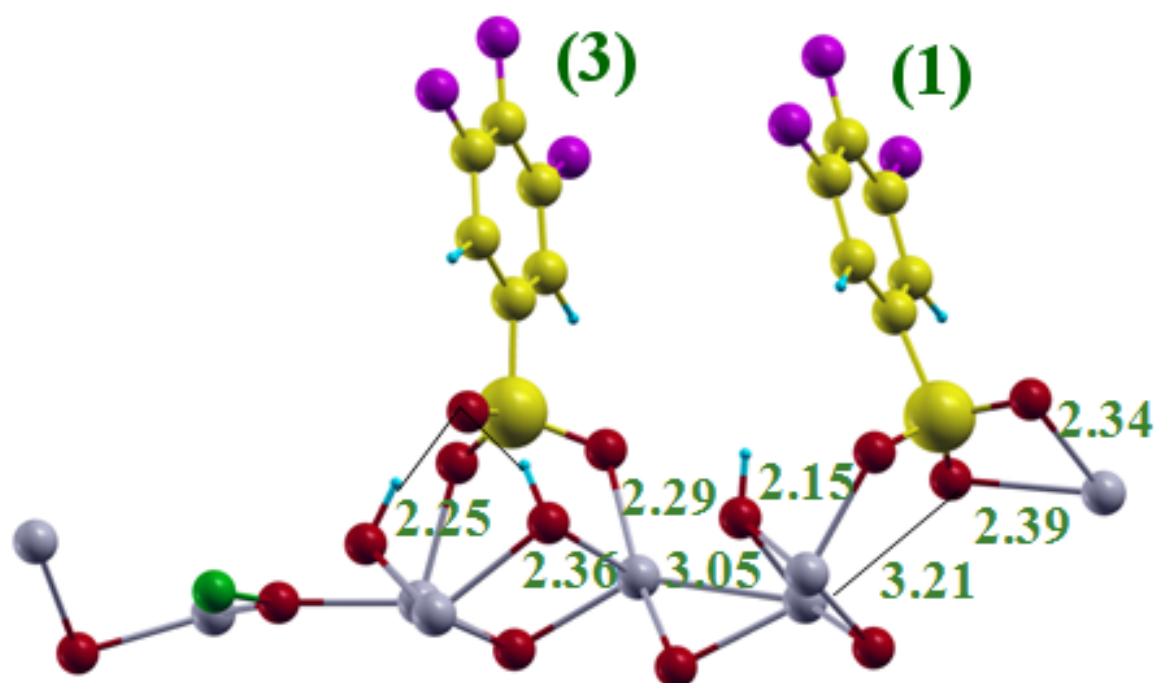

Figure S2. Side view of the fully optimized adsorption geometry of two PA molecules at site-1 and site-3. Only part of the ITO surface is shown. The values in green represent optimized bond lengths (in Å).
